# Supplementary material for: A new method for cartap detection with high sensitivity and selectivity based on the inner filter effect between GSH-Cu NCs and Au NPs
Source: Royal Society of Chemistry journal article supplement (doi:10.1039/d1ay00591j), 2021-01-01
Supplement: d1ay00591j1.pdf [file d1ay00591j1.pdf]

# A new method for cartap detection with high sensitivity and selectivity based on the inner filter effect between GSH-Cu NCs and Au NPs

Haijian Liu<sup>ab\*</sup>, Libin Dong<sup>a</sup>, Miao Wang<sup>a</sup>, Guofu Huang<sup>ab\*</sup>

<sup>a</sup> Shandong Peninsula Engineering Research Center of Comprehensive Brine Utilization, Weifang

University of Science and Technology, Shouguang, 262700 Weifang, China

<sup>b</sup> Weifang Key Laboratory of Pollution Control and Resource Utilization of Chemical Wastewater,

Weifang University of Science and Technology, Shouguang, 262700 Weifang, China

\*Corresponding author:

Haijian Liu, E-mail: liuhaijian.1987@163.com

Guofu Huang, E-mail: 280525600@qq.com

**Fig.S1 The fluorescence intensity of GSH-Cu NCs stored at 4 °C for 2 months.**

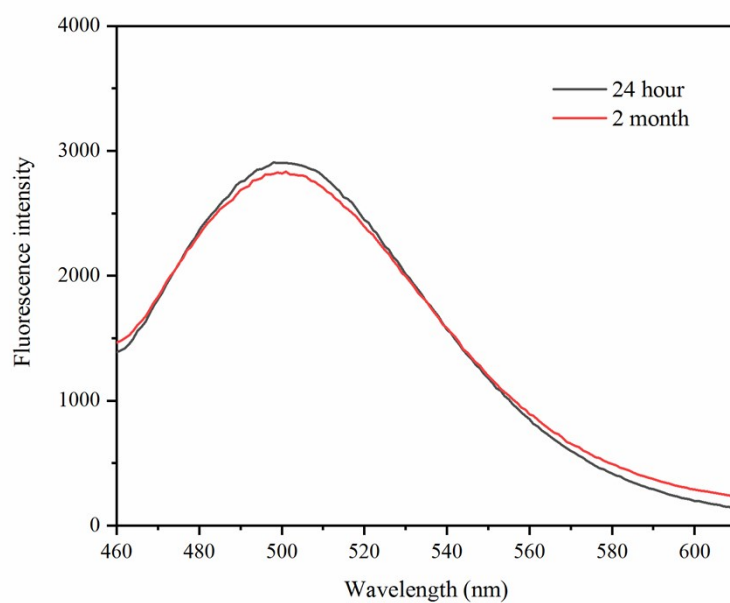

**Fig.S2 Photostability of the GSH-Cu NCs measured with a fluorescence spectrophotometer at 20 min intervals ( $\lambda_{ex} = 430$  nm).**

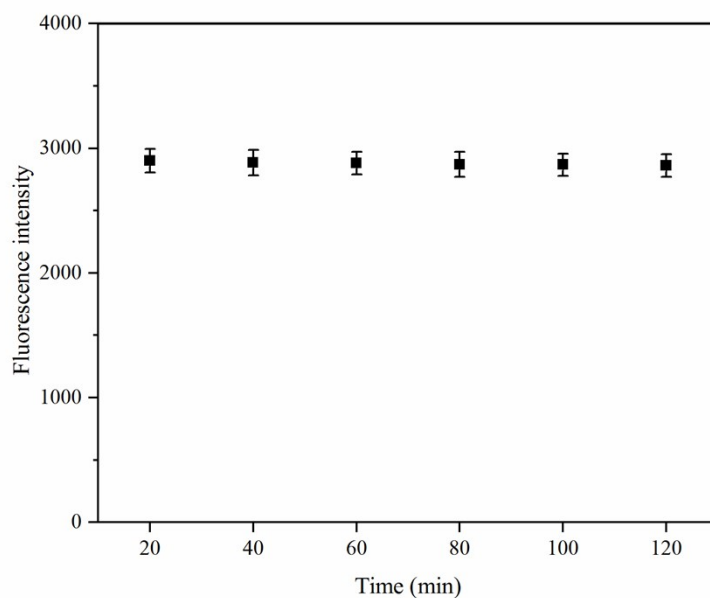

**Fig.S3 The fluorescence intensity of GSH-Cu NCs in the presence of different concentrations of NaCl.**

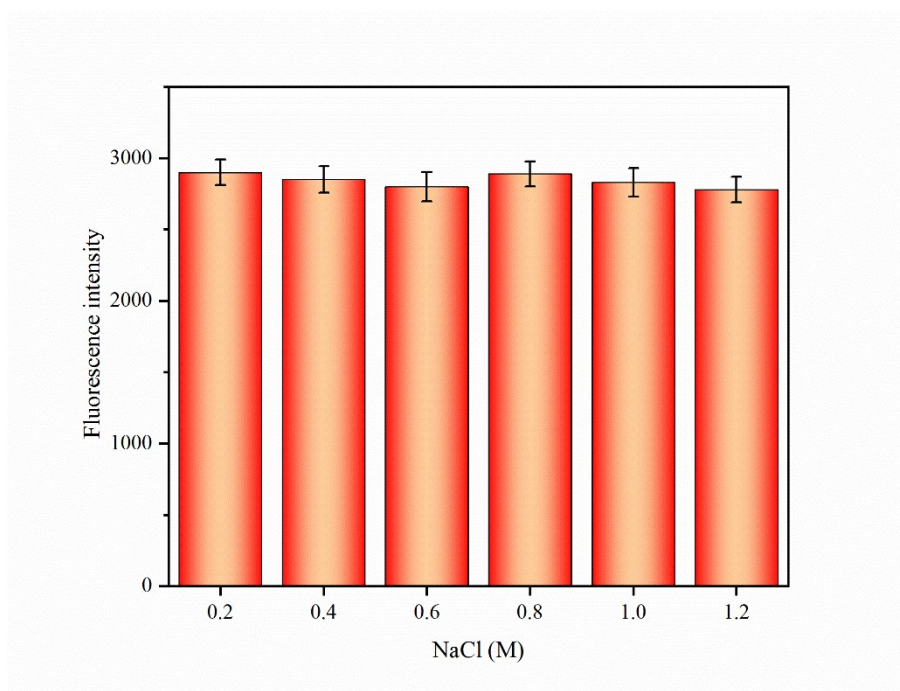

**Fig.S4** Fluorescence intensity of GSH-Cu NCs in the presence of difference Au NPs concentrations (0, 0.58, 0.87, 1.17, 1.46, 1.75, 2.62, 2.93 nM).

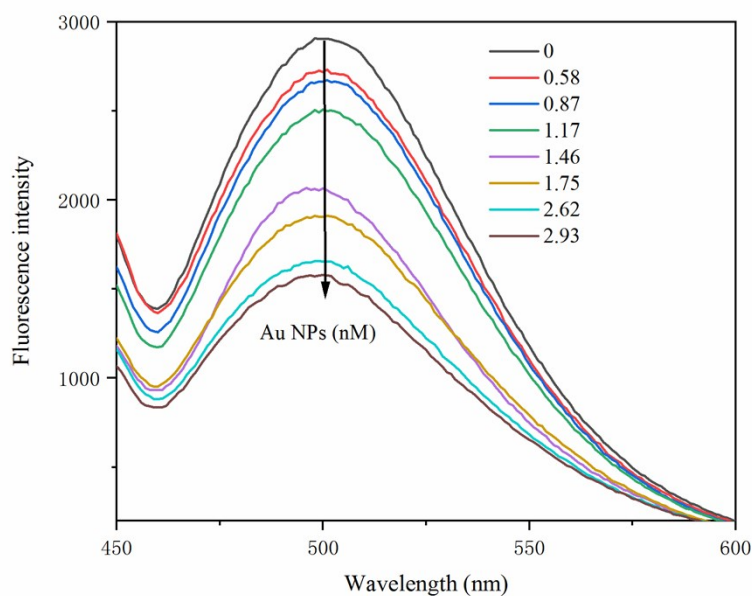

**Fig.S5** (a) different concentrations of Au NPs with 80 nM cartap, (b) different pH in the presence of 80 nM cartap and 1.75 nM Au NPs and (c) the incubation time in the presence of 80 nM cartap, 1.75 nM Au NPs, pH 7.0.  $\Delta F$  represents the fluorescence changes with and without cartap.

(a)

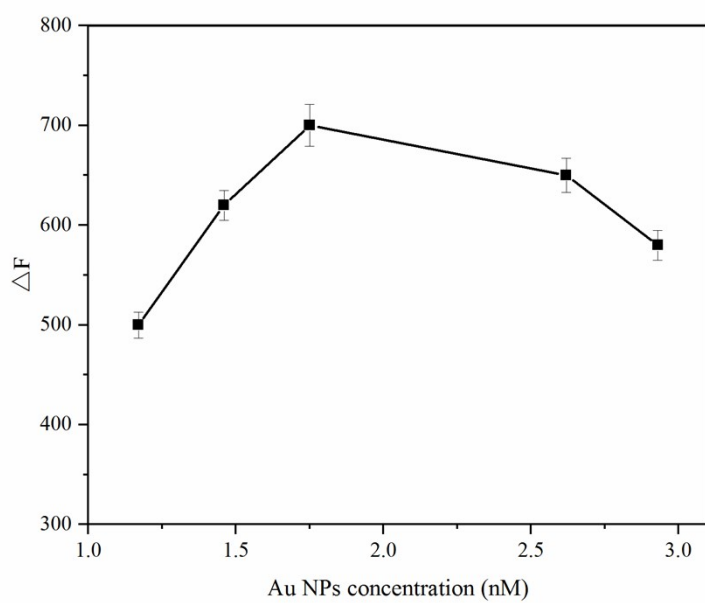

**(b)**

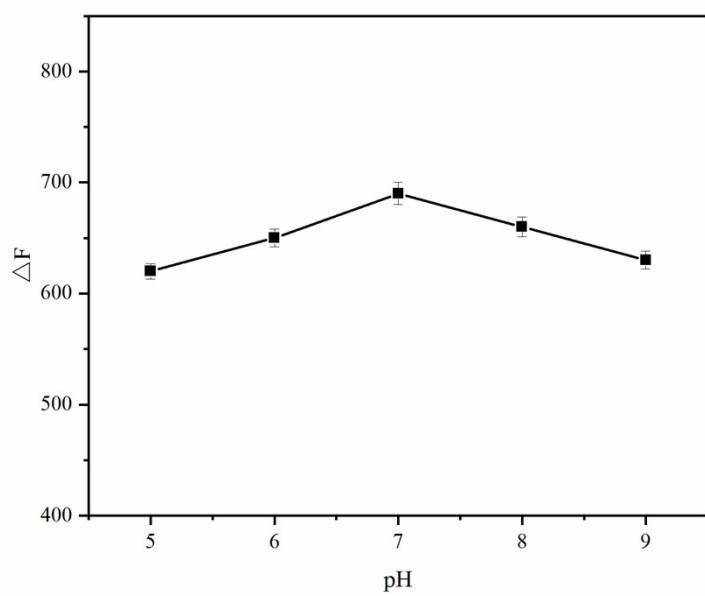

**(c)**

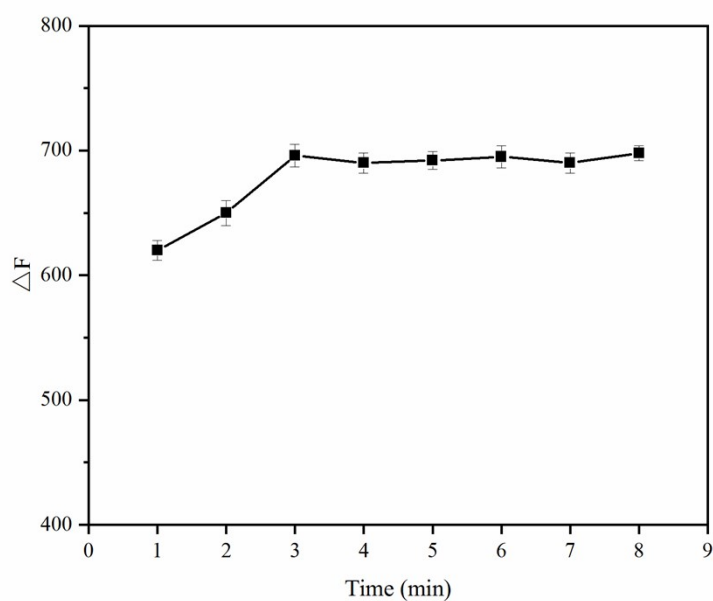

**Fig.S6** Fluorescence emission spectra (A), (C) and the corresponding fluorescence changes (B), (D) of the GSH-Cu NCs and Au NPs system with various interfering substances.

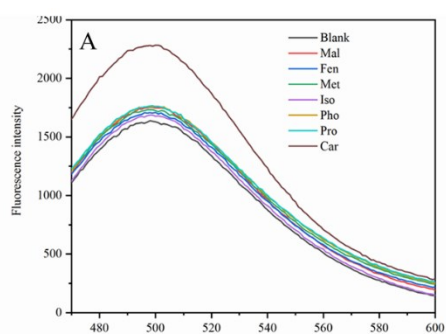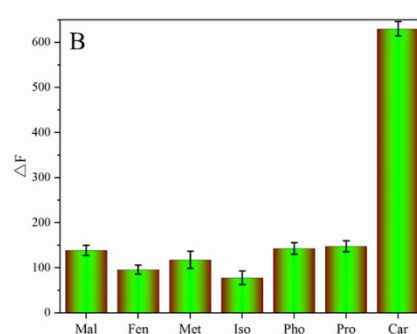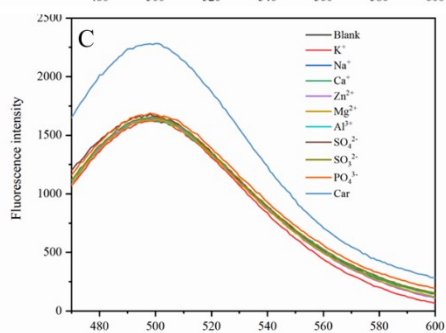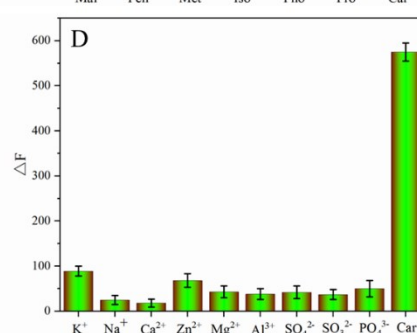

**Fig.S7 (A)TEM image of Au NPs; (B)TEM image of AuNPs after the addition of cartap.**

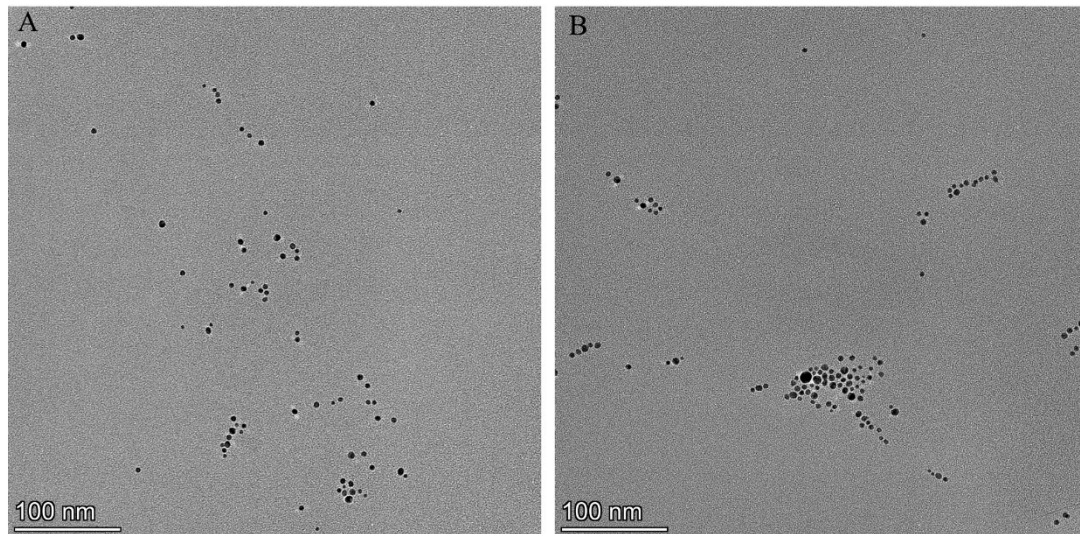

**Fig.S8 DLS images of AuNPs (A) and AuNPs after the addition of cartap (B).**

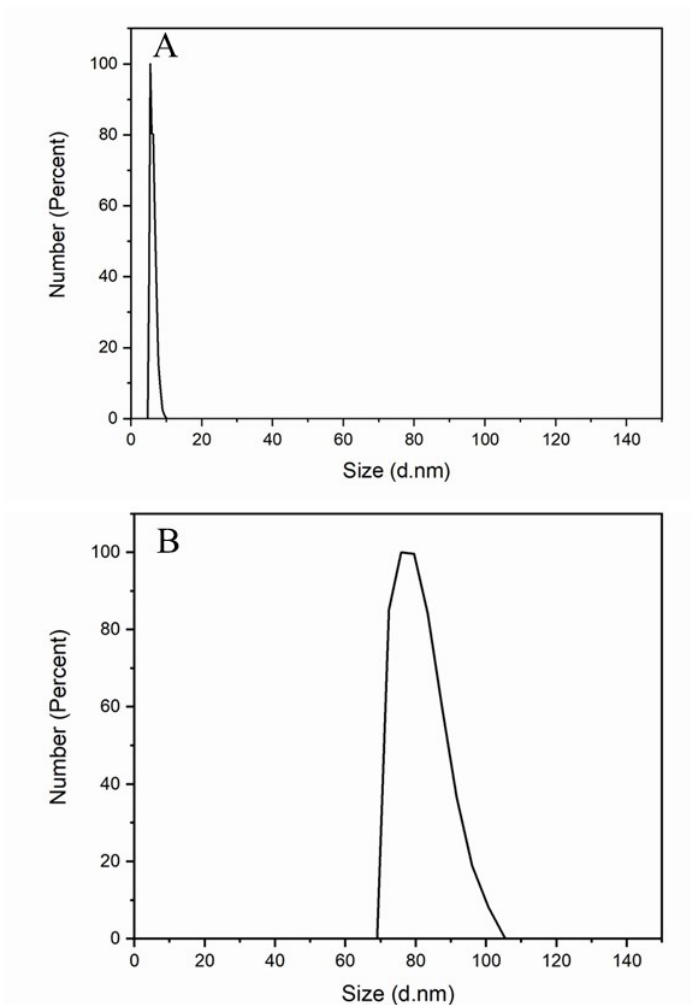

**Table S1 Comparison of analytical performance of some assays for cartap detection.**

| Methods                | Range       | LOD      | Ref       |
|------------------------|-------------|----------|-----------|
| CB[7]-PAL complex      | 30–8770 nM  | 10 nM    | 1         |
| Au NPs                 | 180–2190 nM | 150 nM   | 2         |
| Au@Ag nanoparticles    | 20–240 nM   | 22.64 nM | 3         |
| CdTe QDs and Au NPs    | 40–1830 nM  | 30 nM    | 4         |
| CdTe QDs and MA-Au NPs | 20–100 nM   | 4.02 nM  | 5         |
| CDs and Au NPs         | 5-300 nM    | 3.84 nM  | 6         |
| GSH-Cu NCs and Au NPs  | 7-100 nM    | 3.34 nM  | This work |

**Table S2 Detection of cartap in Chinese cabbage samples via the proposed method and GC-MS method**

| Sample          | Spiked (nM) | The proposed method |                                | GC-MS method |                                |
|-----------------|-------------|---------------------|--------------------------------|--------------|--------------------------------|
|                 |             | Found (nM)          | Recovery $\pm$ RSD (%) (n = 3) | Found (nM)   | Recovery $\pm$ RSD (%) (n = 3) |
| Chinese cabbage | 20          | 21.36               | 106.8 $\pm$ 5.82               | 19.28        | 96.4 $\pm$ 3.57                |
|                 | 40          | 36.57               | 91.4 $\pm$ 4.26                | 41.67        | 104.2 $\pm$ 1.54               |
|                 | 80          | 75.23               | 94 $\pm$ 2.89                  | 78.81        | 98.5 $\pm$ 3.63                |

1. X. Jing, L. M. Du, H. Wu, W. Y. Wu and Y. X. Chang, *J. Integr. Agric.*, 2012, **11**, 1861-1870.
2. W. Liu, D. H. Zhang, Y. F. Tang, Y. S. Wang, F. Yan, Z. H. Li, J. L. Wang and H. S. Zhou, *Talanta*, 2012, **101**, 382-387.
3. P. Y. Yuan, R. Z. Ma and Q. H. Xu, *Sci. China: Chem.*, 2016, **59**, 78-82.
4. J. J. Guo, X. Liu, H. T. Gao, J. X. Bie, Y. Zhang, B. F. Liu and C. Y. Sun, *RSC Adv.*, 2014, **4**, 27228-27235.
5. H. X. Wu, C. J. Hou, H. B. Fa, L. Dong, Y. Ma, M. Yang, C. H. Shen, J. Zhou and D. Q. Huo, *Nano*, 2016, **11**.
6. Y. X. Yang, J. Z. Hou, D. Q. Huo, X. F. Wang, J. W. Li, G. L. Xu, M. H. Bian, Q. He, C. J. Hou and M. Yang, *Microchim. Acta.*, 2019, **186**, 1-8.
